# Supplementary material
Source: Springer Nature journal article supplement (https://www.springermedizin.de/resource/supplementary/12889_2014_6961_MOESM1_ESM.pdf/9499508)
Supplement: MOESM1 [file 9499508]

Women given birth in RN for the  
time period

$N = 149903$

Women with first time  
gestational diabetes

$N = 2238$

Women who claimed prescriptions  
on glucose-lowering agents before  
pregnancy were excluded

$N = 3$

Women receiving any diabetes  
diagnoses before pregnancy  
were excluded

$N = 14$

Women with diabetes diagnoses  
and claimed prescriptions on  
glucose-lowering agents before  
pregnancy were excluded

$N = 50$

Final study population

$N = 2171$
